# Supplementary material for: Cu3N nanowire array as a high-efficiency and durable electrocatalyst for oxygen evolution reaction
Source: Royal Society of Chemistry journal article supplement (doi:10.1039/c9dt00362b), 2019-01-01
Supplement: c9dt00362b1.pdf [file c9dt00362b1.pdf]

## Electronic Supplementary Information

### Experimental section

**Materials:** Ammonium persulfate (APS) and sodium hydroxide (NaOH) were purchased from Aladdin Ltd. (Shanghai, China). Copper foam (CF) was supplied by Jiangsu Yijiasheng Foamed Metal Plant. All reagents were used as received without further purification. Ultrapure water was utilized to prepare all solutions.

**Synthesis of  $\text{Cu}(\text{OH})_2$  NA/CF:** The precursor was prepared according to previous reports.<sup>1,2</sup> A piece of CF (2 cm × 3 cm) was cleaned by hydrochloric acid, ethanol and deionized water several times to remove the surface oxides and impurities. Then the substrate was immediately immersed in 30 mL solution containing 4 mmol APS and 80 mmol NaOH at room temperature for 20 min. After that, the CF was taken out and washed by deionized water for several times. Finally, the as-made  $\text{Cu}(\text{OH})_2$  NA/CF was dry at 60 °C for 12 h.

**Synthesis of  $\text{Cu}_3\text{N}$  NA/CF:** The precursor was placed in the furnace and heated to 350 °C with a heating speed of 2 °C/min under a flowing  $\text{NH}_3$  atmosphere for 3 h. The system was allowed to cool down to room temperature (25 °C) naturally still under a flowing  $\text{NH}_3$  atmosphere.

**Preparation of  $\text{RuO}_2$ /CF electrode:** The  $\text{RuO}_2$  was prepared according to a previous report.<sup>3</sup> Briefly, 1.0 mL NaOH (1.0 M) and 2.61 g  $\text{RuCl}_3 \cdot 3\text{H}_2\text{O}$  were added into 100mL ultrapure water and ultrasound for 30 min at 373 K. The precipitates were collected by centrifugation and washed with water for three times. The obtained solids were dried at 353 K. Finally, the product was annealed at 573 K for 3 h under air atmosphere. The as-prepared  $\text{RuO}_2$  powder (50 mg) was dispersed into a solution of Nafion, ethanol and water with a volume ratio of 20/280/70 via sonication, and deposited onto copper foam with a loading of 2.0 mg  $\text{cm}^{-2}$ .

**Characterizations:** The X-ray diffraction (XRD) patterns were obtained from a LabX XRD-6100 X-ray diffractometer with Cu  $\text{K}\alpha$  radiation (40kV, 30mA) of wavelength 0.154 nm (SHIMADZU, Japan). Scanning electron microscope (SEM) measurements were recorded on a XL30 ESEM FEG scanning electron microscope at an

accelerating voltage of 20 kV. The structures of the samples were determined by Transmission electron microscopy (TEM) images on a HITACHI H-8100 electron microscopy (Hitachi, Tokyo, Japan) operated at 200 kV. X-ray photoelectron spectroscopy (XPS) data of the samples was collected on an ESCALABMK II x-ray photoelectron spectrometer using Mg as the exciting source.

**Electrochemical measurements:** Electrochemical measurements were performed with a CHI 660E electrochemical analyzer (CH Instruments, Inc., Shanghai) in a standard three-electrode system. Cu<sub>3</sub>P-CoP/CC, graphite plate and Hg/HgO was used as the working electrode, the counter electrode and reference electrode, respectively. All tests were carried out in 1.0 M KOH at room temperature. The potentials reported in this work were calibrated to reversible hydrogen electrode (RHE) other than especially explained and the reference electrode was calibrated to RHE scale in all measurements using the following equation:  $E(\text{RHE}) = E(\text{Hg/HgO}) + (0.059 \text{ pH} + 0.098) \text{ V}$ .

**Tafel plots calculation:** The Tafel plots are employed to evaluate the OER catalytic kinetics and fitted with the following equation:

$$\eta = b \log j + a$$

Where  $j$  is the current density and  $b$  is the Tafel slope.

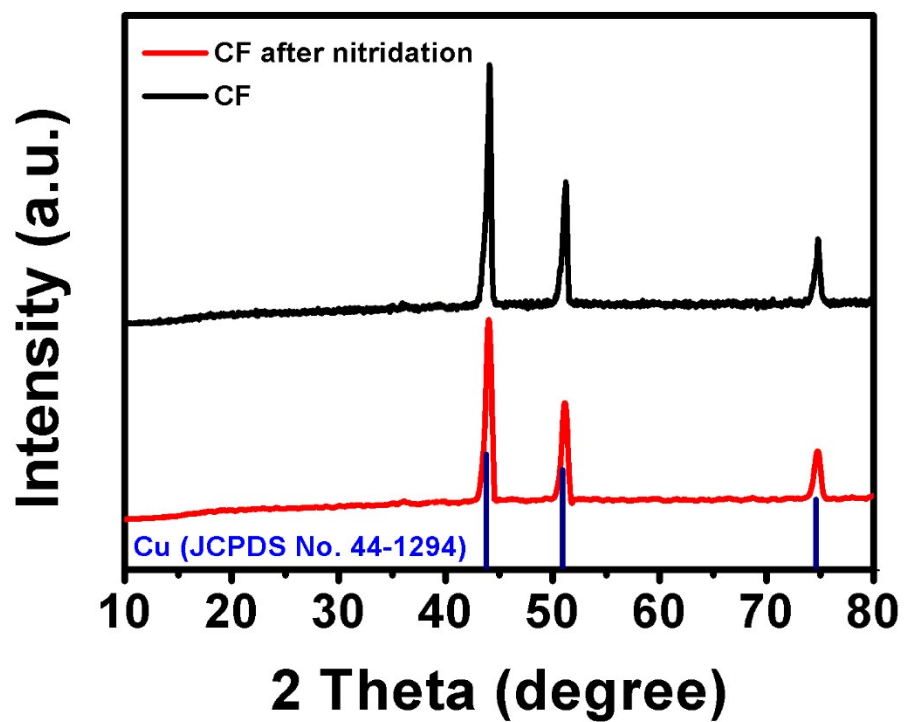

**Fig. S1.** XRD patterns of copper foam before (black line) and after (red line) nitridation process.

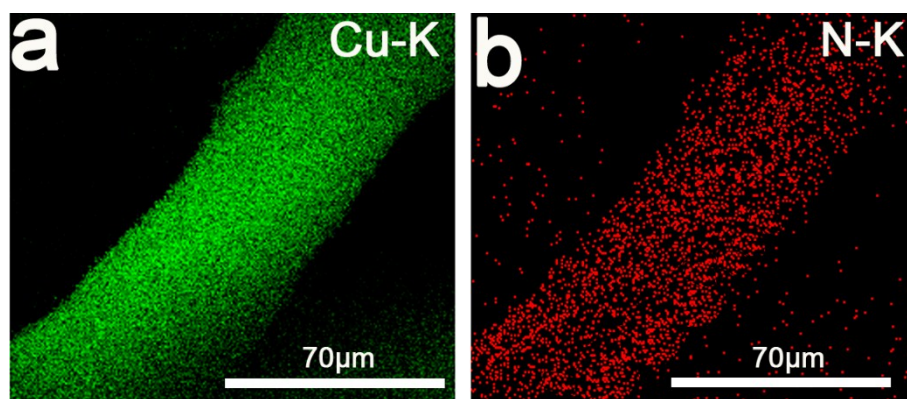

**Fig. S2.** EDX elemental mapping images of Cu and N elements for  $\text{Cu}_3\text{N}$  NA/CF.

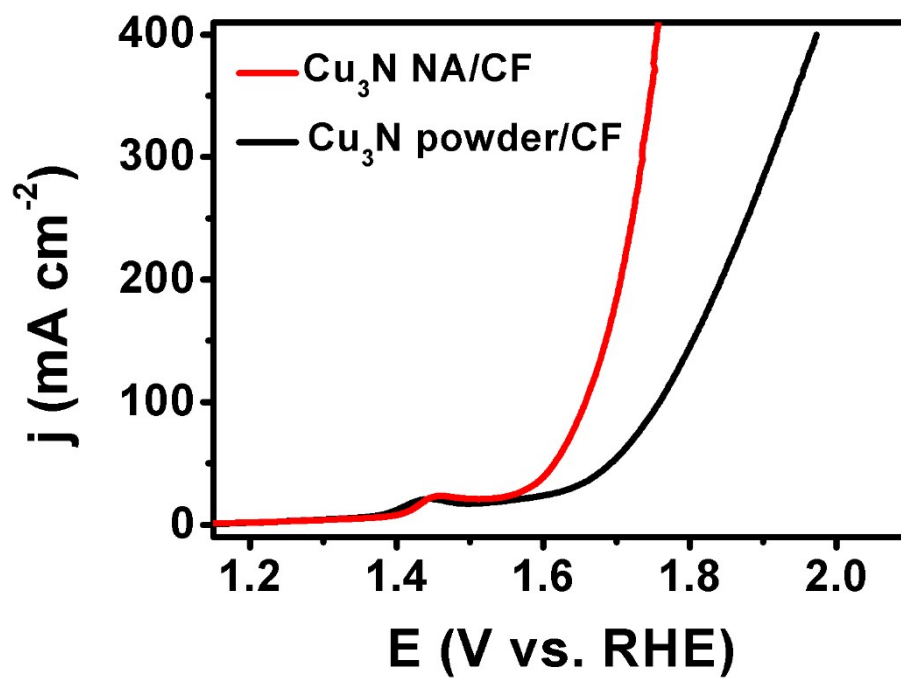

Fig. S3. LVS curves for  $\text{Cu}_3\text{N NA/CF}$  and  $\text{Cu}_3\text{N powder}$ .

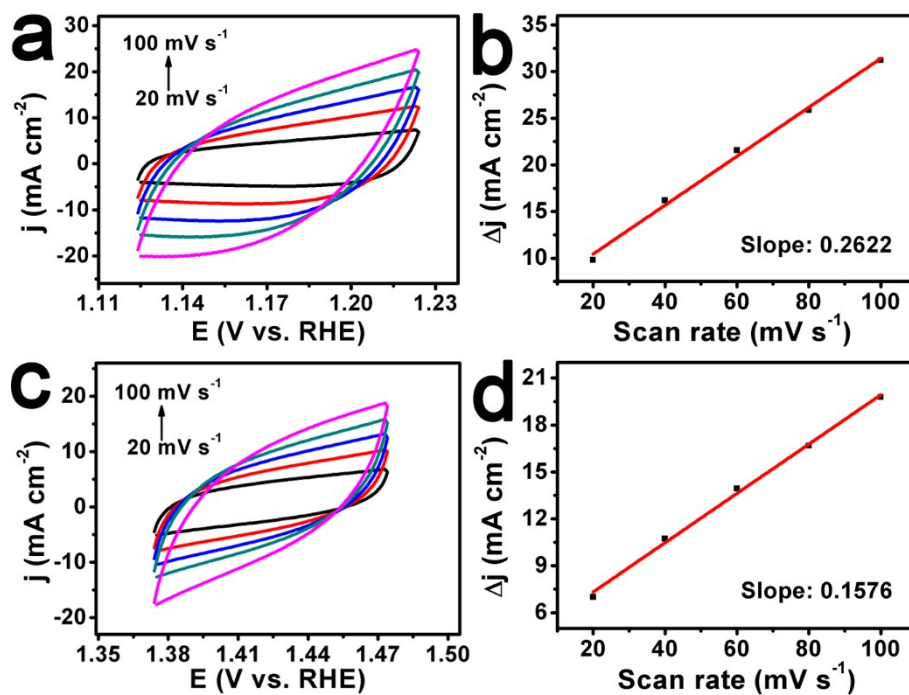

**Fig. S4.** CV curves at various scan rates (20, 40, 60, 80 and 100  $\text{mV s}^{-1}$ ) for (a)  $\text{Cu}_3\text{N}$  NA/CF and (c)  $\text{Cu}(\text{OH})_2$  NA/CF in 1.0 M KOH. The differences ( $\Delta j$ ) between capacitive currents at the center of selected potential window as a function of scan rate for (b)  $\text{Cu}_3\text{N}$  NA/CF and (d)  $\text{Cu}(\text{OH})_2$  NA/CF in 1.0 M KOH. The slope is twice of  $C_{dl}$ .

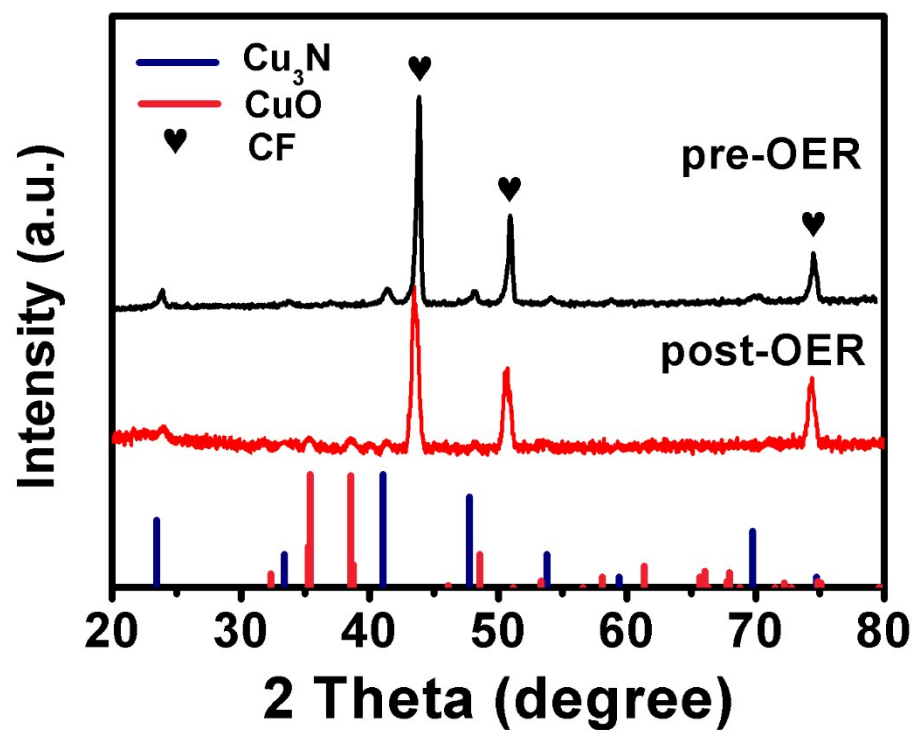

Fig. S5. XRD patterns for Cu<sub>3</sub>N NA/CF before and after OER test.

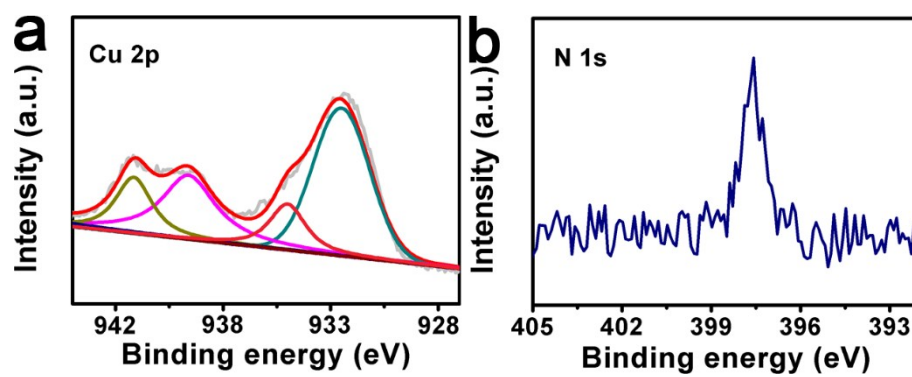

**Fig. S6.** XPS analysis in (a) Cu 2p and (b) N 1s regions for post-OER Cu<sub>3</sub>N NA/CF.



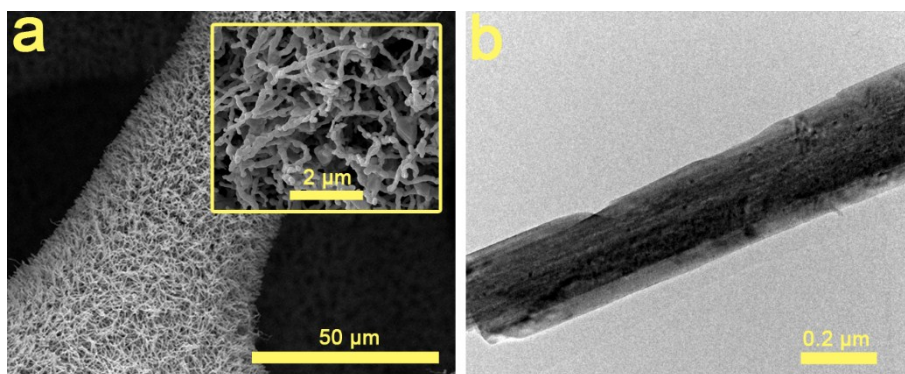

**Fig. S7.** (a) SEM image and (b) TEM image after OER test.

**Table S1.** Comparison of OER performance for Cu<sub>3</sub>N NA/CF with other non-noble-metal electrocatalysts in 1.0 M KOH.

| Catalyst                                         | j (mA cm <sup>-2</sup> ) | Overpotential (mV) | Ref.      |
|--------------------------------------------------|--------------------------|--------------------|-----------|
| Cu <sub>3</sub> N NA/CF                          | 20                       | 298                | This work |
| Cu–N–C NA/CF                                     | 20                       | 314                | 4         |
| CuO-TCNQ/CF                                      | 25                       | 317                | 5         |
| 2D CuO nanosheet bundles                         | 10                       | 350                | 6         |
| Cu <sub>2</sub> O/C                              | 10                       | 330                | 7         |
| Ni <sub>59</sub> Cu <sub>19</sub> P <sub>9</sub> | 10                       | 318.7              | 8         |
| Cu(OH) <sub>2</sub> @CoNiCH NTs/CF               | 30                       | 288                | 9         |
| NC@CoN/Cu <sub>3</sub> N/CF                      | 10                       | 257                | 10        |
| Cu <sub>2</sub> O–Cu foams                       | 10                       | 350                | 11        |
| Co <sub>3</sub> O <sub>4</sub> @C-MWCNTs         | 10                       | 320                | 12        |
| CoMoO <sub>4</sub> nanorod                       | 10                       | 343                | 13        |

## References

- 1 Z. Wang, X. Cao, D. Liu, S. Hao, R. Kong, G. Du, A. M. Asiri and X. Sun, *Chem. Eur. J.*, 2017, **23**, 4986–4989.
- 2 C.-Y. Su, B.-H. Liu, T.-J. Lin, Y.-M. Chi, C.-C. Kei, K.-W. Wang and T.-P. Perng, *J. Mater. Chem. A*, 2015, **3**, 18983–18990.
- 3 J. C. Cruz, V. Baglio, S. Siracusano, V. Antonucci, A. S. Aricò, R. Ornelas, L. Ortiz-Frade, G. Osorio-Monreal, S. M. Durón-Torres and L. G. Arriaga, *Int. J. Electrochem. Sci.*, 2011, **6**, 6607–6619.
- 4 X. Zhu, X. Shi, A. M. Asiri, Y. Luo and X. Sun, *Inorg. Chem. Front.*, 2018, **5**, 1188–1192.
- 5 X. Ren, X. Ji, Y. Wei, D. Wu, Y. Zhang, M. Ma, Z. Liu, A. M. Asiri, Q. Wei and X. Sun, *Chem. Commun.*, 2018, **54**, 1425–1428.
- 6 S. M. Pawar, B. S. Pawar, B. Hou, J. Kim, A. T. A. Ahmed, H. S. Chavan, Y. Jo, S. Cho, A. I. Inamdar, J. L. Gunjekar, H. Kim, S. Cha and H. Im, *J. Mater. Chem. A*, 2017, **5**, 12747–12751.
- 7 H. Zhang, Z. Zhang, N. Li, W. Yan and Z. Zhu, *J. Catal.*, 2017, **352**, 239–245.
- 8 B. K. Kima, S.-K. Kimb, S. K. Choc and J. J. Kim, *Appl. Catal. B: Environ.*, 2018, **237**, 409–415.
- 9 J. Kang, J. Sheng, J. Xie, H. Ye, J. Chen, X.-Z. Fu, G. Du, R. Sun and C.-P. Wong, *J. Mater. Chem. A*, 2018, **6**, 10064–10073.
- 10 J. Li, X. Kong, M. Jiang and X. Lei, *Inorg. Chem. Front.*, 2018, **5**, 2906–2913.
- 11 H. Xu, J.-X. Feng, Y.-X. Tong and G.-R. Li, *ACS Catal.*, 2017, **7**, 986–991.
- 12 X. Li, Y. Fang, X. Lin, M. Tian, X. An, Y. Fu, R. Li, J. Jin and J. Ma, *J. Mater. Chem. A*, 2015, **3**, 17392–17402.
- 13 X. Liu, Y. Yang and S. Guan, *Chem. Phys. Lett.*, 2017, **675**, 11–14.
